# Supplementary material for: Flame-made amorphous solid acids with tunable acidity for the aqueous conversion of glucose to levulinic acid
Source: Royal Society of Chemistry journal article supplement (doi:10.1039/c9gc02567g), 2019-11-14
Supplement: c9gc02567g1.pdf [file c9gc02567g1.pdf]

# Flame-made amorphous solid acids with tunable acidity for the aqueous conversion of glucose to levulinic acid

## Supporting Information

Gein Khai Beh,<sup>a,1</sup> Chang Ting Wang,<sup>a,1</sup> Kyungduk Kim,<sup>b,1</sup> Jiangtao Qu,<sup>c</sup> Julie Cairney,<sup>c</sup> Yun Hau Ng,<sup>a</sup> Alicia Kyoungjin An,<sup>a</sup> Ryong Ryoo,<sup>b,d</sup> Atsushi Urakawa,<sup>e,f</sup> Wey Yang Teoh<sup>a,g,\*</sup>

<sup>a</sup>School of Energy and Environment, City University of Hong Kong, Kowloon, Hong Kong S.A.R.

<sup>b</sup>Center for Nanomaterials and Chemical Reactions, Institute of Basic Science (IBS), Daejeon 34141, Republic of Korea

<sup>c</sup>Australian Centre for Microscopy and Microanalysis, School of Aerospace, Mechanical and Mechatronic Engineering, The University of Sydney, NSW 2006, Australia

<sup>d</sup>Department of Chemistry, Korea Advanced Institute of Science and Technology (KAIST), Daejeon 34141, Republic of Korea

<sup>e</sup>Catalysis Engineering, Department of Chemical Engineering, Delft University of Technology, Van der Maasweg 9, 2629 HZ Delft, The Netherlands

<sup>f</sup>Institute of Chemical Research of Catalonia (ICIQ), The Barcelona Institute of Science and Technology, 43007 Tarragona, Spain

<sup>g</sup>School of Chemical Engineering, The University of New South Wales, Sydney, NSW 2052, Australia

\*Corresponding author. Email: wy.teoh@unsw.edu.au

<sup>1</sup>G.K.B, C.T.W. and K.K. contributed equally to this work

**Table S1.** XPS-determined surface elemental composition of different flame-made catalysts as well as that of commercial ZSM-5.

| Catalyst  | Surface elemental composition (%) |      |      |      |     |
|-----------|-----------------------------------|------|------|------|-----|
|           | Al                                | Si   | P    | O    | C   |
| a-SA0     | -                                 | 33.0 | -    | 65.8 | 1.3 |
| a-SA20    | 2.7                               | 30.0 | -    | 63.9 | 3.5 |
| a-SA40    | 7.7                               | 24.8 | -    | 62.3 | 5.3 |
| a-SA60    | 16.2                              | 17.8 | -    | 61.8 | 4.2 |
| a-SA80    | 23.7                              | 11.2 | -    | 60.6 | 4.6 |
| a-SA100   | 36.8                              | -    | -    | 58.8 | 4.4 |
| a-SAPO0   | 10.5                              | -    | 19.3 | 66.4 | 3.8 |
| a-SAPO25  | 11.0                              | 7.2  | 14.0 | 66.6 | 1.2 |
| a-SAPO40  | 11.1                              | 9.3  | 11.4 | 64.8 | 3.3 |
| a-SAPO67  | 9.2                               | 16.0 | 7.3  | 64.6 | 3.0 |
| a-SAPO80  | 10.4                              | 17.8 | 4.6  | 63.1 | 4.1 |
| a-SAPO100 | 9.1                               | 24.1 | -    | 62.4 | 4.4 |
| ZSM-5     | 2.5                               | 29.4 | -    | 61.3 | 6.8 |

The level of surface carbon content detected by XPS (in Table S1) is typical of any clean samples, which C–C bond is taken as the reference binding energy (284.9 eV). They originated from the trace volatile organic carbons in the ambient that ubiquitously adsorbed on the samples surface. The amount of surface carbon as shown in Table S1 are considered minimal and typical of clean samples.

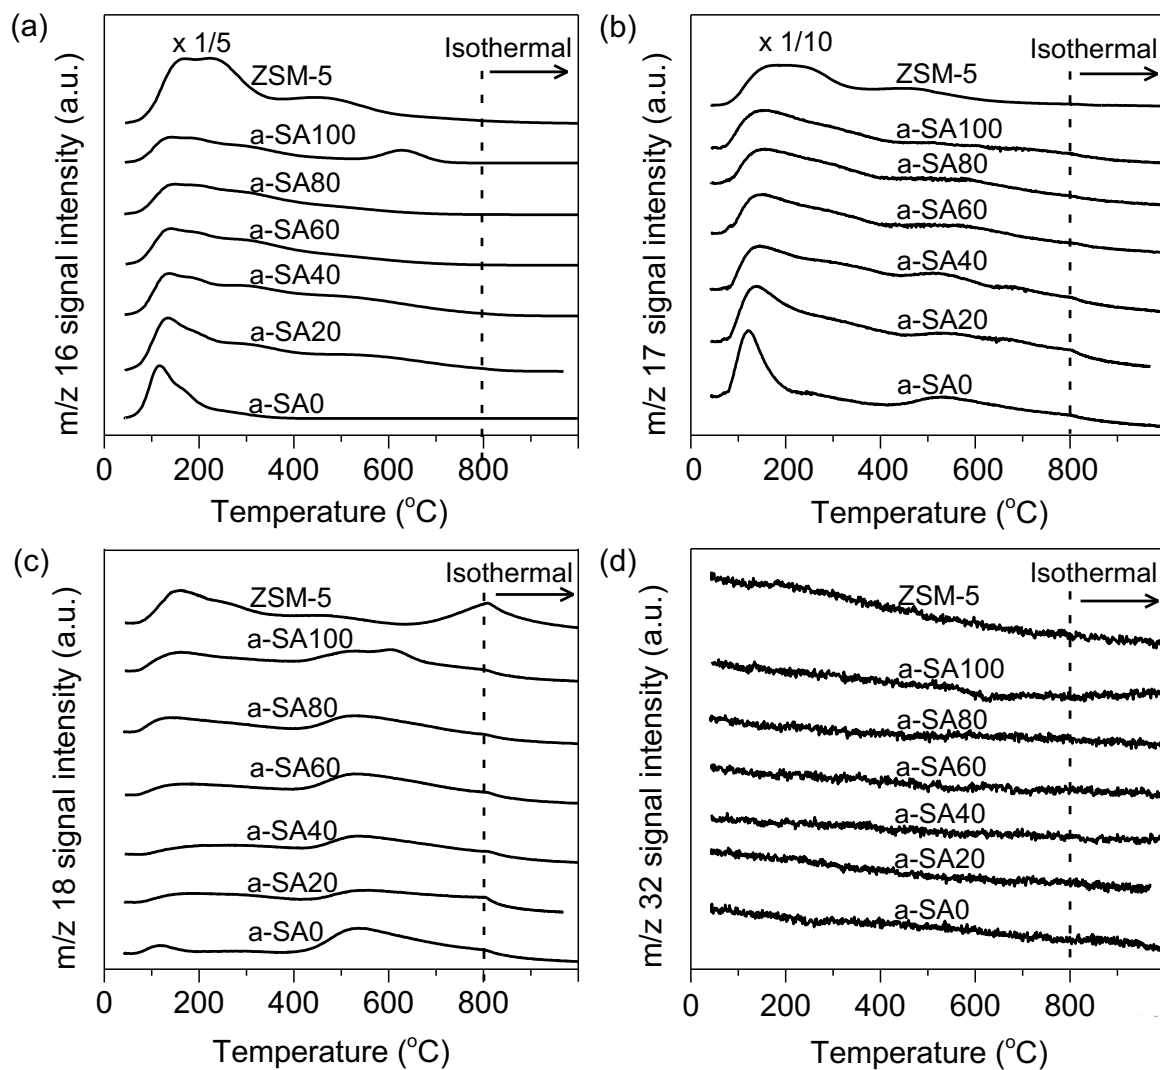

**Fig. S1.** Mass spectra of  $\text{NH}_3$  monitored at (a)  $m/z = 16$ , and (b)  $m/z = 17$ , as well as that of (c)  $\text{H}_2\text{O}$  ( $m/z = 18$ ) and (d)  $\text{O}_2$  ( $m/z = 32$ ) during the  $\text{NH}_3$ -TPD analysis of a-SA samples.

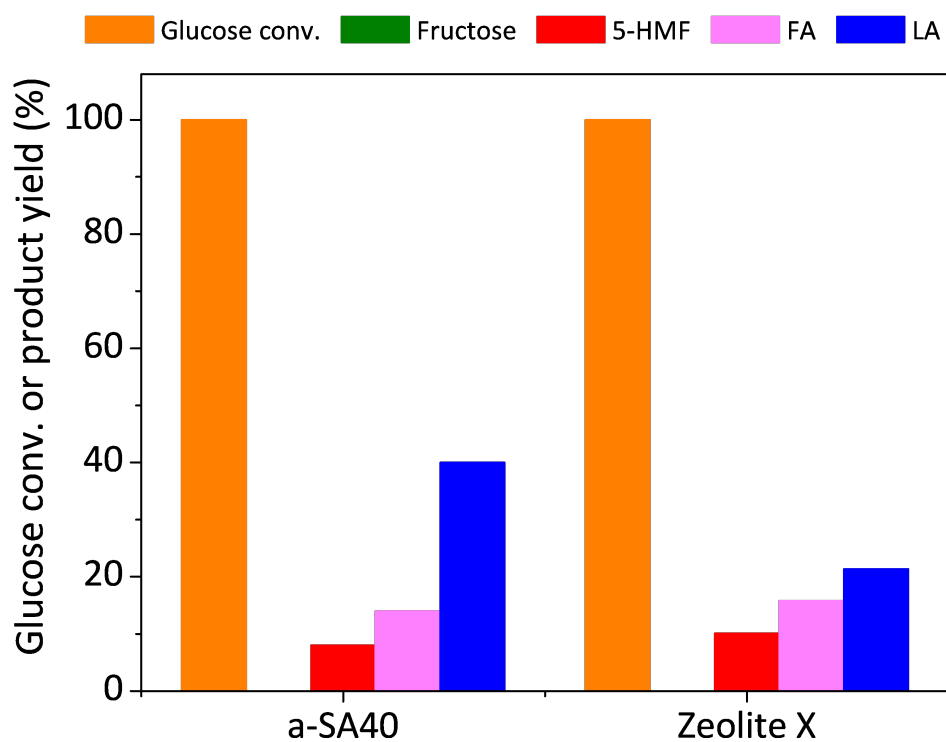

**Fig. S2.** Comparison of glucose conversion and products yields between the flame-made a-SA40 and protonated Zeolite X, where both catalysts have the same composition of  $\text{Al}/(\text{Si}+\text{Al}) = 0.40$ . Reaction temperature: 180 °C.

**Table S2.** Elemental composition of a-SA40 and a-SAPO25 before (fresh) and after (spent) glucose conversion reaction, as well as the calcined (450 °C, 1 h) spent catalysts.

| Catalyst          | Surface elemental composition (%) |      |      |      |      |
|-------------------|-----------------------------------|------|------|------|------|
|                   | Al                                | Si   | P    | O    | C    |
| a-SA40 (Fresh)    | 7.7                               | 24.8 | -    | 62.3 | 5.3  |
| a-SA40 (Spent)    | 15.2                              | 10.3 | -    | 44.2 | 30.2 |
| a-SA40 (450 °C)   | 15.8                              | 19.6 | -    | 55.4 | 9.2  |
| a-SAPO25 (Fresh)  | 11.0                              | 7.2  | 14.0 | 66.6 | 1.2  |
| a-SAPO25 (Spent)  | 10.1                              | 1.3  | 7.8  | 46.2 | 34.6 |
| a-SAPO25 (450 °C) | 15.8                              | 1.6  | 13.9 | 55.1 | 13.7 |
